# Supplementary material for: Preparation and Characterization of Synchronous Chemical Conversion Coating on 6061 Aluminum Alloy/7075 Aluminum Alloy/Galvanized Steel Substrates
Source: MDPI journal article supplement (doi:10.3390/met12122011), 2022-11-23
Supplement: s1 [file s1]

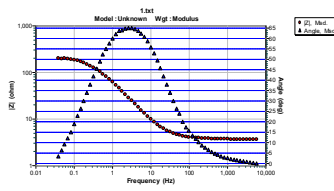

6061 aluminum alloy

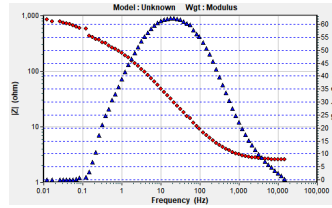

7075 aluminum alloy

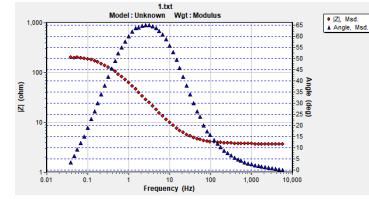

galvanized steel

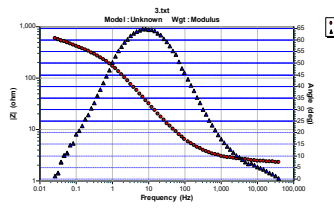

conversion film on 6061 aluminum alloy

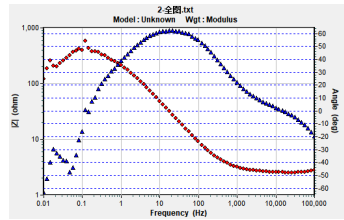

conversion film on 7075 aluminum alloy

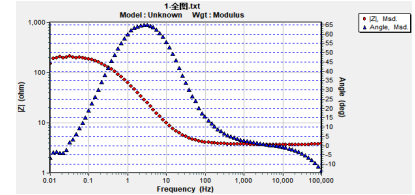

conversion film on galvanized steel

**Figure S1:** Bode and Bode Phase graphs

**Table S1:** The parameters of  $R_s$ ,  $R_f$ ,  $Q_1$ ,  $Q_2$  and  $R_{ct}$

| Samples                                | $i_{corr}/\mu A \cdot cm^{-2}$ | $E_{corr}/V$ | $R_{ct}/\Omega$ | $R_s/\Omega$ | $R_f/\Omega$ | $Q_1$                  | $Q_2$                  |
|----------------------------------------|--------------------------------|--------------|-----------------|--------------|--------------|------------------------|------------------------|
| with conversion AA6061                 | 0.174                          | -1.084       | 84610           | 8.66         | 3675         | $6.317 \times 10^{-5}$ | $9.334 \times 10^{-5}$ |
| without conversion<br>AA6061           | 1.096                          | -1.151       | 0.268           | 12.97        | 919          | $8.661 \times 10^{-4}$ | $6.221 \times 10^{-4}$ |
| with conversion AA7075                 | 0.018                          | -0.603       | 23250           | 7.03         | 2876         | $9.112 \times 10^{-5}$ | $3.666 \times 10^{-5}$ |
| without conversion<br>AA7075           | 1.470                          | -0.653       | 19330           | 11.64        | 799          | $7.663 \times 10^{-4}$ | $2.729 \times 10^{-4}$ |
| with conversion<br>galvanized steel    | 1.012                          | -0.838       | 13010           | 6.07         | 2017         | $1.117 \times 10^{-4}$ | $3.915 \times 10^{-4}$ |
| without conversion<br>galvanized steel | 6.312                          | -0.938       | 5441            | 9.88         | 366          | $7.664 \times 10^{-4}$ | $9.226 \times 10^{-3}$ |
